# Supplementary material
Source: publisher figshare collection journal article supplement (https://sage.figshare.com/ndownloader/files/40903440)
Supplement: Supplementary file 1 [file 40903440]

Table 3. *Regression Models*

| Suicidality, linear regression (n=2,160) |  | *B* | *SE* | *z* | *p* |
| --- | --- | --- | --- | --- | --- |
| Age |  | -0.026 | 0.018 | -1.470 | 0.142 |
| **Sexual minority (vs. heterosexual/straight)** |  | **0.187** | **0.022** | **8.630** | **< 0.001** |
| Gender |  |  |  |  |  |
| **Gender minority** (vs. man) |  | **0.078** | **0.023** | **3.310** | **0.001** |
| Woman (vs. man) |  | -0.011 | 0.019 | -0.567 | 0.571 |
| **University** |  | **0.073** | **0.021** | **3.530** | **< 0.001** |
| Race and ethnicity |  |  |  |  |  |
| Black (vs. non-Latine White) |  | -0.012 | 0.022 | -0.552 | 0.581 |
| Latinx (vs. non-Latine White) |  | -0.018 | 0.021 | -0.849 | 0.396 |
| Asian (vs. non-Latine White) |  | -0.006 | 0.021 | -0.296 | 0.767 |
| Multiracial (vs. non-Latine White) |  | 0.003 | 0.018 | 0.164 | 0.870 |
| Other race (vs. non-Latine White) |  | -0.030 | 0.016 | -1.871 | 0.061 |
| First generation college student |  | 0.005 | 0.020 | 0.272 | 0.785 |
| Sexual assault history severity |  | 0.040 | 0.023 | 1.702 | 0.089 |
| **Average drinks per week** |  | **0.047** | **0.024** | **2.000** | **0.045** |
| **Posttraumatic stress symptom severity** |  | **0.447** | **0.020** | **22.039** | **< 0.001** |
| Current urge to harm self, negative binomial (n=1,429) | *IRR* | *B* | *SE* | *z* | *p* |
| Age | 0.988 | -0.036 | 0.081 | -0.446 | 0.655 |
| **Sexual minority (vs. heterosexual/straight)** | **1.298** | **0.235** | **0.086** | **2.743** | **0.006** |
| Gender |  |  |  |  |  |
| Gender minority (vs. man) | 0.939 | -0.030 | 0.096 | -0.309 | 0.758 |
| Woman (vs. man) | 1.030 | 0.025 | 0.098 | 0.257 | 0.797 |
| University | 1.056 | 0.050 | 0.091 | 0.552 | 0.581 |
| Race and ethnicity |  |  |  |  |  |
| Black (vs. non-Latine White) | 0.964 | -0.027 | 0.098 | -0.273 | 0.785 |
| Latinx (vs. non-Latine White) | 0.977 | -0.015 | 0.078 | -0.195 | 0.845 |
| Asian (vs. non-Latine White) | 1.074 | 0.053 | 0.093 | 0.576 | 0.564 |
| Multiracial (vs. non-Latine White) | 0.926 | -0.030 | 0.073 | 0.073 | 0.679 |
| Other race (vs. non-Latine White) | 1.205 | 0.075 | 0.068 | 1.105 | 0.269 |
| First generation college student | 1.118 | 0.096 | 0.084 | 1.141 | 0.254 |
| Sexual assault history severity | 1.003 | 0.124 | 0.097 | 1.280 | 0.201 |
| Average drinks per week | 1.002 | 0.023 | 0.083 | 0.273 | 0.785 |
| **Posttraumatic stress symptom severity** | **1.054** | **0.879** | **0.049** | **17.814** | **<0.001** |
| Current suicidal intent, negative binomial (n=1,429) |  | *B* | *SE* | *z* | *p* |
| Age | 0.992 | -0.093 | 0.092 | -1.012 | 0.312 |
| Sexual minority (vs. heterosexual/straight) | 1.001 | 0.005 | 0.106 | 0.052 | 0.959 |
| Gender |  |  |  |  |  |
| Gender minority (vs. man) | 0.993 | -0.013 | 0.143 | -0.091 | 0.927 |
| Woman (vs. man) | 0.942 | -0.208 | 0.113 | -1.844 | 0.065 |
| University | 1.002 | 0.006 | 0.122 | 0.052 | 0.958 |
| Race and ethnicity |  |  |  |  |  |
| Black (vs. non-Latine White) | 1.042 | 0.125 | 0.127 | 0.982 | 0.326 |
| Latinx (vs. non-Latine White) | 0.987 | -0.035 | 0.109 | -0.320 | 0.749 |
| Asian (vs. non-Latine White) | 1.054 | 0.158 | 0.124 | 1.278 | 0.201 |
| Multiracial (vs. non-Latine White) | 0.963 | -0.060 | 0.086 | -0.701 | 0.483 |
| Other race (vs. non-Latine White) | 1.026 | 0.042 | 0.125 | 0.335 | 0.737 |
| **First generation college student** | **1.074** | **0.248** | **0.109** | **2.271** | **0.023** |
| **Sexual assault history severity** | **1.002** | **0.341** | **0.156** | **2.187** | **0.029** |
| Average drinks per week | 1.003 | 0.159 | 0.140 | 1.139 | 0.255 |
| **Posttraumatic stress symptom severity** | **1.011** | **0.751** | **0.098** | **7.677** | **< 0.001** |

*Note.* Significant effects are bolded.
